# Supplementary material for: Periodic B- and N-doped phenalenyl π-aggregates: unexpected nonlinear optical properties by tuning pancake π–π bonding
Source: Royal Society of Chemistry journal article supplement (doi:10.1039/d1cp03540a), 2021-01-01
Supplement: d1cp03540a1.pdf [file d1cp03540a1.pdf]

Supporting Information

**Periodic B- and N-doped Phenalenyl  $\pi$ -Aggregates:  
Unexpected Nonlinear Optical Properties by Tuning Pancake  $\pi$  -  $\pi$  Bonding**

Feng-Wei Gao<sup>ab</sup>, Shi-Bin Li<sup>a</sup>, Hong-Liang Xu<sup>c,\*</sup> and Zhong-Min Su<sup>ab,\*</sup>

<sup>[a]</sup> School of Chemistry & Environmental Engineering, Changchun University of Science and Technology, Changchun, 130022, People's Republic of China.

<sup>[b]</sup> Jilin Provincial Science and Technology Innovation Center of Optical Materials and Chemistry, Changchun 130022, People's Republic of China.

<sup>[c]</sup> Institute of Functional Material Chemistry, Department of Chemistry, Northeast Normal University, Changchun, 130024, People's Republic of China.

**Table of Contents**

1. The qualitative frontier orbital visualizations of the studied  $\pi$ -aggregates in Figure S1. S2
2. Frontier molecular orbital of the crucial excited state for hexamer [12]<sub>3</sub> in Figure S2. S3
3. The static hyperpolarizabilities ( $\beta_{\text{tot}}$ , a.u.) of the studied  $\pi$ -aggregates with even layers in Table S1. S4
4. The first hyperpolarizabilities ( $\beta_{\text{tot}}$ , a.u.) of the studied  $\pi$ -aggregates with odd layers in Table S2. S5
5. The transition energies ( $\Delta E$ , eV), the oscillator strength ( $f_0$ ), the difference of dipole moments ( $\Delta\mu$ , Debye) between the ground and excited states of the studied  $\pi$ -aggregates with odd-numbered layers in Table S3. S6
6. The frequency-dependent  $\beta(-\omega, \omega, 0)$  and  $\beta(-2\omega, \omega, \omega)$  values of the studied  $\pi$ -aggregates with odd layers calculated at the M05-2X level at  $\omega = 0.0000, 0.0100$  and  $0.0239$  a.u. in Table S4. S7
7. Cartesian coordinates of the optimized structures of dimer[12], trimer[12-1], trimer[12-2], tetramer[12]<sub>2</sub>, pentamer[12]<sub>2</sub>-1, [12]<sub>2</sub>-2, and hexamer[12]<sub>3</sub>. S8-22

**Figure S1.** The qualitative frontier orbital visualizations of the studied  $\pi$ -aggregates.

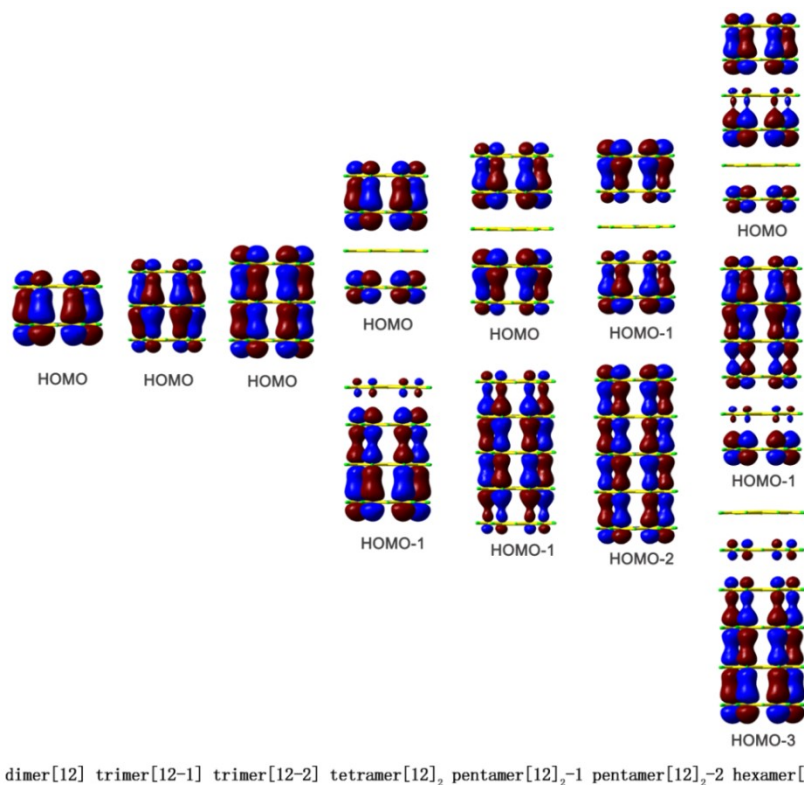

Figure S1 shows the qualitative frontier orbital visualizations of the studied  $\pi$ -aggregates. For PLY-B and PLY-N dimer[12], the bonding character of dimer corresponds to the bonding combination of monomer orbitals, which can be attributed to the overlap of the highest-occupied molecular orbital (HOMO) of the N-PLY and the lowest-occupied molecular orbital (LUMO) of the B-PLY monomer [ref. Chem. Eur. J. 2011, 17, 11773 – 11779]. Figure S1 shows the qualitative frontier orbital visualizations of  $\pi$ -aggregates. Note that the HOMO exhibits effective orbitals overlap of the N-PLY and the B-PLY monomer in  $\pi$ -aggregates.

**Figure S2.** Frontier molecular orbital of the crucial excited state for hexamer [12]<sub>3</sub>.

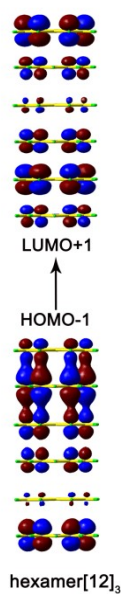

The crucial transitions of hexamer[12]<sub>3</sub> are mainly dominated from HOMO-1 to LUMO+1, which exhibits intermolecular charge transfer transitions through pancake  $\pi$ - $\pi$  bonding. The above results further confirms that hexamer[12]<sub>3</sub> has the largest  $\beta_{\text{tot}}$  values compared to dimer[12] and tetramer[12]<sub>2</sub>.

**Table S1.** The first hyperpolarizabilities ( $\beta_{\text{tot}}$ , a.u.) of the studied  $\pi$ -aggregates with even layers at the M05-2X/6-31+G\*\* level.

|          |                      | dimer[12]          | tetramer[12] <sub>2</sub> | hexamer[12] <sub>3</sub> |
|----------|----------------------|--------------------|---------------------------|--------------------------|
| 6-31G**  | $\beta_x$            | 1.93               | -10.03                    | $-4.65 \times 10^2$      |
|          | $\beta_y$            | -1.43              | 12.05                     | $-1.74 \times 10^2$      |
|          | $\beta_z$            | $2.67 \times 10^3$ | $-9.16 \times 10^3$       | $-5.68 \times 10^4$      |
|          | $\beta_{\text{tot}}$ | $2.67 \times 10^3$ | $9.16 \times 10^3$        | $5.68 \times 10^4$       |
| 6-31+G*  | $\beta_x$            | 1.14               | -13.37                    | $-4.84 \times 10^2$      |
|          | $\beta_y$            | -1.35              | 11.57                     | $-1.76 \times 10^2$      |
|          | $\beta_z$            | $2.47 \times 10^3$ | $-8.97 \times 10^3$       | $-5.71 \times 10^4$      |
|          | $\beta_{\text{tot}}$ | $2.47 \times 10^3$ | $8.97 \times 10^3$        | $5.71 \times 10^4$       |
| 6-31+G** | $\beta_x$            | 1.45               | -11.28                    | $-4.78 \times 10^2$      |
|          | $\beta_y$            | -0.97              | 11.64                     | $-1.76 \times 10^2$      |
|          | $\beta_z$            | $2.55 \times 10^3$ | $-8.95 \times 10^3$       | $-5.71 \times 10^4$      |
|          | $\beta_{\text{tot}}$ | $2.55 \times 10^3$ | $8.95 \times 10^3$        | $5.72 \times 10^4$       |

**Table S2.** The first hyperpolarizabilities ( $\beta_{\text{tot}}$ , a.u.) of the studied  $\pi$ -aggregates with odd layers at the M05-2X/6-31+G\*\* level.

|          |                      | trimer[12-1] | trimer[12-2] | pentamer[12] <sub>2-1</sub> | pentamer[12] <sub>2-2</sub> |
|----------|----------------------|--------------|--------------|-----------------------------|-----------------------------|
| 6-31G**  | $\beta_x$            | 33.72        | 24.61        | 50.03                       | 79.70                       |
|          | $\beta_y$            | 3.67         | 3.36         | -3.39                       | 3.70                        |
|          | $\beta_z$            | -43.78       | -38.42       | $-7.06 \times 10^2$         | $-6.41 \times 10^2$         |
|          | $\beta_{\text{tot}}$ | 55.38        | 45.75        | $7.07 \times 10^2$          | $6.46 \times 10^2$          |
| 6-31+G*  | $\beta_x$            | 29.70        | 21.28        | 34.96                       | 65.66                       |
|          | $\beta_y$            | 3.88         | 3.24         | -4.00                       | 2.83                        |
|          | $\beta_z$            | -45.85       | -38.22       | $-7.18 \times 10^2$         | $-6.36 \times 10^2$         |
|          | $\beta_{\text{tot}}$ | 54.77        | 43.87        | $7.19 \times 10^2$          | $6.40 \times 10^2$          |
| 6-31+G** | $\beta_x$            | 29.74        | 23.58        | 37.58                       | 71.95                       |
|          | $\beta_y$            | 4.02         | 3.30         | -3.74                       | 3.05                        |
|          | $\beta_z$            | -46.21       | -38.51       | $-7.21 \times 10^2$         | $-6.41 \times 10^2$         |
|          | $\beta_{\text{tot}}$ | 55.10        | 45.28        | $7.22 \times 10^2$          | $6.41 \times 10^2$          |

Table S1 and S2 results show that the  $\beta_{\text{tot}}$  of  $\pi$ -aggregates with even layers (dimer[12], tetramer[12]<sub>2</sub> and hexamer[12]<sub>3</sub>) are larger than those of  $\pi$ -aggregates with odd layers (trimer[12-1], [12-2] and pentamer[12]<sub>2-1</sub>, pentamer[12]<sub>2-2</sub>). Significantly, the  $\beta_{\text{tot}}$  values of these  $\pi$ -aggregates are found to increase with increasing of even layers thickness, which presents in the order of hexamer[12]<sub>3</sub>>tetramer[12]<sub>2</sub>>dimer[12].

**Table S3.** The transition energies ( $\Delta E$ , eV), the oscillator strength ( $f_0$ ), the difference of dipole moments ( $\Delta\mu$ , Debye) between the ground and excited states of the studied  $\pi$ -aggregates with odd-numbered layers.

|                         | trimer[12-1] | trimer[12-2] | pentamer[12] <sub>2-1</sub> | pentamer[12] <sub>2-2</sub> |
|-------------------------|--------------|--------------|-----------------------------|-----------------------------|
| $\Delta E$              | 1.8173       | 2.0215       | 1.5467                      | 1.6184                      |
| $f_0$                   | 0.4431       | 0.4720       | 0.9627                      | 0.9813                      |
| $\mu_g$                 | 0.0064       | 0.0073       | 0.0462                      | 0.0464                      |
| $\mu_e$                 | 0.0075       | 0.0110       | 0.0336                      | 0.0249                      |
| $\Delta\mu$             | 0.0011       | 0.0037       | 0.0126                      | 0.0215                      |
| $\Delta\mu \cdot f_0 /$ | 0.64         | 1.67         | 25.97                       | 39.43                       |
| $\Delta E$              |              |              |                             |                             |

**Table S4.** The frequency-dependent  $\beta(-\omega, \omega, 0)$  and  $\beta(-2\omega, \omega, \omega)$  values of the studied  $\pi$ -aggregates with odd layers calculated at the M05-2X level at  $\omega = 0.000, 0.0100$  and  $0.0239$  a.u..

|                                   | $\omega$ (a.u.)   | trimer<br>[12-1] | trimer<br>[12-2] | pentamer<br>[12] <sub>2</sub> -1 | pentamer<br>[12] <sub>2</sub> -2 |
|-----------------------------------|-------------------|------------------|------------------|----------------------------------|----------------------------------|
| $\beta_{\text{tot}}$              | $\omega = 0$      | 55               | 45               | 722                              | 645                              |
| $\beta(-\omega, \omega, 0)$       | $\omega = 0.0100$ | 60               | 44               | 770                              | 684                              |
|                                   | $\omega = 0.0239$ | 73               | 53               | 1077                             | 923                              |
| $\beta(-2\omega, \omega, \omega)$ | $\omega = 0.0100$ | 65               | 48               | 882                              | 772                              |
|                                   | $\omega = 0.0239$ | 138              | 89               | 3842                             | 2683                             |

**Cartesian coordinates of the optimized structures of dimer[12], trimer[12-1], trimer[12-2], tetramer[12]<sub>2</sub>, pentamer[12]<sub>2-1</sub>, [12]<sub>2-2</sub>, and hexamer[12]<sub>3</sub>.**

All the calculations were implemented in Gaussian09 package. The geometries of dimer[12], trimer[12-1], trimer[12-2], tetramer[12]<sub>2</sub>, pentamer[12]<sub>2-1</sub>, [12]<sub>2-2</sub>, and hexamer[12]<sub>3</sub> were optimized with a well-tested density functional theory (DFT) method. The M05-2X functional with the 6-31G\*\* basis set was used for all atoms. All the optimized structures with all real frequencies were obtained.

**(1) dimer [12]**

| <b>dimer [12]</b>                  |             |             |             |
|------------------------------------|-------------|-------------|-------------|
| The total energy = -1004.9018 a.u. |             |             |             |
| Atom                               | X           | Y           | Z           |
| C                                  | 1.41045600  | -2.45767500 | 1.52595300  |
| C                                  | -0.75704600 | -1.30315700 | 1.57141700  |
| C                                  | 1.50268900  | -0.00367600 | 1.57417700  |
| C                                  | 2.14269800  | -1.26160200 | 1.52562900  |
| C                                  | -2.16657700 | -1.22773200 | 1.52029800  |
| C                                  | -0.75197500 | 1.30469700  | 1.57455200  |
| C                                  | -2.16176800 | 1.23498400  | 1.52358900  |
| C                                  | -2.83517000 | 0.00489700  | 1.52105600  |
| C                                  | 1.42007600  | 2.45078000  | 1.53126100  |
| C                                  | 2.14755800  | 1.25180800  | 1.52809500  |
| H                                  | 3.23514000  | 1.31319300  | 1.50940500  |
| H                                  | 1.96419300  | 3.38811800  | 1.50872400  |
| H                                  | -2.76804300 | -2.13573700 | 1.49822700  |
| H                                  | 1.95084500  | -3.39711500 | 1.50133800  |
| H                                  | -0.48162700 | -3.46187200 | 1.50077400  |
| H                                  | 3.23002300  | -1.32724200 | 1.50704600  |
| H                                  | -3.91900000 | 0.00706000  | 1.49412400  |
| H                                  | -0.46798300 | 3.46254000  | 1.50952000  |
| H                                  | -2.75970700 | 2.14538200  | 1.50446800  |
| C                                  | 2.80006100  | -0.00454900 | -1.51656000 |
| C                                  | 2.10819200  | 1.18939900  | -1.48535600 |
| C                                  | 0.70175600  | 1.20811700  | -1.48987800 |
| C                                  | 0.69723800  | -1.20947000 | -1.49214300 |
| C                                  | 2.10370300  | -1.19594200 | -1.48691200 |
| C                                  | -0.01282300 | 2.41952100  | -1.48728200 |
| C                                  | -1.39458700 | 0.00318200  | -1.49046000 |
| C                                  | -2.08090800 | 1.23071200  | -1.48613400 |
| C                                  | -1.39290500 | 2.42703800  | -1.51869900 |
| C                                  | -1.40197200 | -2.42060900 | -1.52407800 |
| H                                  | 0.55234300  | -3.33258700 | -1.50138100 |
| H                                  | -1.94488200 | -3.35700600 | -1.53896700 |



|   |             |             |             |
|---|-------------|-------------|-------------|
| H | 0.56478600  | 3.33177400  | -1.49393700 |
| H | 3.88260400  | -0.00660100 | -1.52712000 |
| H | 2.61366900  | 2.14339400  | -1.49201200 |
| H | 2.60564200  | -2.15180000 | -1.49482900 |
| H | -1.93236900 | 3.36545900  | -1.53108600 |
| H | -3.16440700 | -1.17875100 | -1.49631700 |
| H | -3.15993900 | 1.19176800  | -1.49352100 |
| C | -2.08553300 | -1.22183100 | -1.48864300 |
| C | 0.01814500  | 2.48780400  | 1.52860700  |
| C | 0.00837200  | -2.48914500 | 1.52281500  |
| C | -0.02185300 | -2.41820500 | -1.49260300 |
| B | -0.00239900 | -0.00075400 | 1.60698700  |
| N | 0.00148600  | 0.00064900  | -1.49230000 |

(2) **trimer[12-1]**

| <b>trimer[12-1]</b> |           | The total energy = -1492.4091 a.u. |          |  |
|---------------------|-----------|------------------------------------|----------|--|
| Atom                | X         | Y                                  | Z        |  |
| C                   | 1.434838  | -2.459864                          | 1.572182 |  |
| C                   | -0.731807 | -1.303734                          | 1.549912 |  |
| C                   | 1.524238  | -0.005714                          | 1.541574 |  |
| C                   | 2.165418  | -1.262633                          | 1.571247 |  |
| C                   | -2.140829 | -1.230049                          | 1.589767 |  |
| C                   | -0.727369 | 1.299920                           | 1.552493 |  |
| C                   | -2.136899 | 1.231068                           | 1.592011 |  |
| C                   | -2.811344 | 0.001740                           | 1.594211 |  |
| C                   | 1.443414  | 2.448505                           | 1.577666 |  |
| C                   | 2.169881  | 1.249092                           | 1.574104 |  |
| H                   | 3.257364  | 1.310066                           | 1.587136 |  |
| H                   | 1.986984  | 3.385642                           | 1.593955 |  |
| H                   | -2.741369 | -2.138504                          | 1.608592 |  |
| H                   | 1.975412  | -3.398764                          | 1.586330 |  |
| H                   | -0.457272 | -3.462657                          | 1.596693 |  |
| H                   | 3.252683  | -1.327493                          | 1.583948 |  |
| H                   | -3.894701 | 0.003437                           | 1.616491 |  |
| H                   | -0.445402 | 3.457618                           | 1.603773 |  |
| H                   | -2.734232 | 2.141599                           | 1.612420 |  |
| C                   | 0.041366  | 2.483443                           | 1.583728 |  |
| C                   | 0.032943  | -2.490190                          | 1.578524 |  |
| B                   | 0.021307  | -0.003170                          | 1.525241 |  |
| C                   | 1.467821  | -2.469444                          | 7.828336 |  |
| C                   | -0.698168 | -1.312646                          | 7.875806 |  |
| C                   | 1.558376  | -0.015500                          | 7.864804 |  |

|   |           |           |          |
|---|-----------|-----------|----------|
| C | 2.198851  | -1.272658 | 7.825363 |
| C | -2.107622 | -1.238317 | 7.850508 |
| C | -0.692654 | 1.291071  | 7.879859 |
| C | -2.102401 | 1.222805  | 7.854349 |
| C | -2.777470 | -0.006350 | 7.856070 |
| C | 1.478175  | 2.438905  | 7.835734 |
| C | 2.204126  | 1.239024  | 7.828997 |
| H | 3.291458  | 1.299635  | 7.805166 |
| H | 2.022080  | 3.375793  | 7.816236 |
| H | -2.708636 | -2.146521 | 7.835404 |
| H | 2.007733  | -3.408575 | 7.805988 |
| H | -0.424938 | -3.471396 | 7.819530 |
| H | 3.285916  | -1.337867 | 7.801638 |
| H | -3.860990 | -0.004039 | 7.844827 |
| H | -0.410270 | 3.448863  | 7.830579 |
| H | -2.699546 | 2.133603  | 7.842177 |
| C | 2.834797  | -0.014315 | 4.697027 |
| C | 2.140860  | 1.178380  | 4.702218 |
| C | 0.734474  | 1.195903  | 4.709280 |
| C | 0.729674  | -1.216179 | 4.706079 |
| C | 2.136043  | -1.204293 | 4.699071 |
| C | 0.021609  | 2.408095  | 4.714678 |
| C | -1.357159 | -0.006021 | 4.717764 |
| C | -2.044288 | 1.220843  | 4.723114 |
| C | -1.358580 | 2.418517  | 4.721392 |
| C | -1.368295 | -2.430605 | 4.714695 |
| H | 0.588446  | -3.338779 | 4.703926 |
| H | -1.911631 | -3.367026 | 4.716158 |
| H | 0.601673  | 3.319072  | 4.713057 |
| H | 3.917522  | -0.016503 | 4.691569 |
| H | 2.644555  | 2.133585  | 4.701159 |
| H | 2.635948  | -2.161481 | 4.695546 |
| H | -1.898188 | 3.357081  | 4.725480 |
| H | -3.128237 | -1.184804 | 4.725199 |
| H | -3.123506 | 1.179825  | 4.728451 |
| C | -2.049183 | -1.230212 | 4.719665 |
| C | 0.076284  | 2.474464  | 7.843485 |
| C | 0.065759  | -2.499130 | 7.835723 |
| C | 0.011935  | -2.425561 | 4.708073 |
| B | 0.055646  | -0.012414 | 7.896144 |
| N | 0.035803  | -0.008723 | 4.711082 |

(3) trimer[12-2]

| <b>trimer[12-2]</b> The total energy = -1522.3050 a.u. |           |           |           |
|--------------------------------------------------------|-----------|-----------|-----------|
| Atom                                                   | X         | Y         | Z         |
| C                                                      | 1.434228  | -2.459811 | 1.582207  |
| C                                                      | -0.734101 | -1.306177 | 1.594337  |
| C                                                      | 1.526526  | -0.005187 | 1.585103  |
| C                                                      | 2.166555  | -1.263569 | 1.580545  |
| C                                                      | -2.144132 | -1.230902 | 1.601300  |
| C                                                      | -0.729819 | 1.303156  | 1.597465  |
| C                                                      | -2.140210 | 1.232584  | 1.604084  |
| C                                                      | -2.812807 | 0.001961  | 1.606176  |
| C                                                      | 1.442429  | 2.449626  | 1.588457  |
| C                                                      | 2.170800  | 1.251117  | 1.583731  |
| H                                                      | 3.258785  | 1.312003  | 1.578803  |
| H                                                      | 1.986691  | 3.387771  | 1.586967  |
| H                                                      | -2.744828 | -2.139961 | 1.603100  |
| H                                                      | 1.975475  | -3.399689 | 1.578293  |
| H                                                      | -0.458764 | -3.465089 | 1.589501  |
| H                                                      | 3.254330  | -1.328106 | 1.575480  |
| H                                                      | -3.897489 | 0.003668  | 1.611461  |
| H                                                      | -0.447258 | 3.461091  | 1.597909  |
| H                                                      | -2.737850 | 2.143650  | 1.607845  |
| C                                                      | 2.798872  | -0.004211 | -1.579618 |
| C                                                      | 2.110005  | 1.191192  | -1.555471 |
| B                                                      | 0.703443  | 1.210718  | -1.546966 |
| C                                                      | 0.698765  | -1.211104 | -1.549921 |
| C                                                      | 2.105386  | -1.196991 | -1.558203 |
| C                                                      | -0.011772 | 2.421991  | -1.544577 |
| C                                                      | -1.396572 | 0.003837  | -1.535456 |
| C                                                      | -2.082333 | 1.231881  | -1.531527 |
| C                                                      | -1.391831 | 2.426478  | -1.556001 |
| C                                                      | -1.401215 | -2.418752 | -1.562258 |
| C                                                      | 0.552088  | -3.334484 | -1.555288 |
| C                                                      | -1.944577 | -3.355502 | -1.568368 |
| C                                                      | 0.564990  | 3.334682  | -1.547254 |
| H                                                      | 3.881835  | -0.006301 | -1.591785 |
| H                                                      | 2.616274  | 2.144665  | -1.556459 |
| H                                                      | 2.607961  | -2.152412 | -1.561478 |
| H                                                      | -1.931551 | 3.365343  | -1.559726 |
| H                                                      | -3.165907 | -1.179282 | -1.527457 |
| H                                                      | -3.161298 | 1.193826  | -1.523920 |
| H                                                      | -2.087092 | -1.221548 | -1.534987 |
| H                                                      | 0.040309  | 2.486670  | 1.594768  |
| H                                                      | 0.032107  | -2.492336 | 1.588628  |

|   |           |           |           |
|---|-----------|-----------|-----------|
| C | -0.021154 | -2.419595 | -1.550689 |
| C | 0.020510  | -0.002750 | 1.592166  |
| C | 0.001915  | 0.001174  | -1.545888 |
| C | 2.833597  | -0.014130 | 4.737450  |
| C | 2.144735  | 1.181449  | 4.723375  |
| C | 0.738125  | 1.201170  | 4.728811  |
| C | 0.733066  | -1.220674 | 4.725417  |
| C | 2.139741  | -1.206771 | 4.719873  |
| C | 0.023112  | 2.412497  | 4.736859  |
| C | -1.362111 | -0.005392 | 4.734410  |
| H | -2.047675 | 1.222715  | 4.740713  |
| H | -1.356764 | 2.417122  | 4.761518  |
| H | -1.366910 | -2.428017 | 4.755072  |
| H | 0.586117  | -3.344001 | 4.726764  |
| H | -1.910294 | -3.364730 | 4.764113  |
| H | 0.600017  | 3.325100  | 4.736221  |
| H | 3.916632  | -0.016414 | 4.738835  |
| H | 2.651172  | 2.134835  | 4.722096  |
| H | 2.642200  | -2.162252 | 4.715952  |
| C | -1.896239 | 3.356062  | 4.773060  |
| C | -3.131636 | -1.188277 | 4.740834  |
| C | -3.126661 | 1.184848  | 4.743565  |
| C | -2.052812 | -1.230701 | 4.737628  |
| B | 0.013001  | -2.429023 | 4.730172  |
| N | 0.036402  | -0.008274 | 4.731432  |

(4) tetramer [12]<sub>2</sub>

| <b>tetramer [12]<sub>2</sub></b> The total energy = -2009.8189 a.u. |             |             |            |
|---------------------------------------------------------------------|-------------|-------------|------------|
| Atom                                                                | X           | Y           | Z          |
| C                                                                   | 1.43475900  | -2.46043900 | 1.51779600 |
| C                                                                   | -0.73328700 | -1.30637600 | 1.55309100 |
| C                                                                   | 1.52624700  | -0.00579900 | 1.54232900 |
| C                                                                   | 2.16653600  | -1.26382500 | 1.51179100 |
| C                                                                   | -2.14334000 | -1.23144800 | 1.53465900 |
| C                                                                   | -0.72903600 | 1.30203200  | 1.55710700 |
| C                                                                   | -2.13939700 | 1.23180400  | 1.53831000 |
| C                                                                   | -2.81237700 | 0.00128600  | 1.54188900 |
| C                                                                   | 1.44279600  | 2.44914100  | 1.52532900 |
| C                                                                   | 2.17066700  | 1.25022700  | 1.51551500 |
| H                                                                   | 3.25853300  | 1.31104500  | 1.50295200 |
| H                                                                   | 1.98689500  | 3.38705800  | 1.51228600 |
| H                                                                   | -2.74400500 | -2.14042100 | 1.52966400 |
| H                                                                   | 1.97582700  | -3.40006500 | 1.50194100 |
| H                                                                   | -0.45830500 | -3.46522700 | 1.51710800 |
| H                                                                   | 3.25419300  | -1.32821600 | 1.49907000 |

|   |             |             |             |
|---|-------------|-------------|-------------|
| H | -3.89684000 | 0.00303300  | 1.53487200  |
| H | -0.44700300 | 3.46003200  | 1.52775100  |
| H | -2.73705100 | 2.14277300  | 1.53612100  |
| C | 2.80423400  | -0.00395100 | -1.57632700 |
| C | 2.11328600  | 1.19037900  | -1.54407600 |
| C | 0.70671300  | 1.20909400  | -1.53855200 |
| C | 0.70260000  | -1.20994700 | -1.54178200 |
| C | 2.10920300  | -1.19602800 | -1.54747200 |
| C | -0.00825200 | 2.42037800  | -1.53307500 |
| C | -1.39061500 | 0.00312000  | -1.52720600 |
| C | -2.07705400 | 1.23073000  | -1.52006100 |
| C | -1.38852000 | 2.42661800  | -1.55202300 |
| C | -1.39681300 | -2.42031000 | -1.55847300 |
| H | 0.55737900  | -3.33328400 | -1.54971000 |
| H | -1.93974600 | -3.35690500 | -1.56879400 |
| H | 0.56879400  | 3.33293100  | -1.54097700 |
| H | 3.88683700  | -0.00578500 | -1.59291800 |
| H | 2.61891900  | 2.14424200  | -1.55071000 |
| H | 2.61157700  | -2.15158900 | -1.55707100 |
| H | -1.92823200 | 3.36509300  | -1.55988400 |
| H | -3.16012300 | -1.17965500 | -1.52132200 |
| H | -3.15606800 | 1.19194000  | -1.51833300 |
| C | -2.08124300 | -1.22217200 | -1.52333000 |
| C | 0.04055000  | 2.48566800  | 1.52997700  |
| C | 0.03244600  | -2.49248500 | 1.52231300  |
| C | -0.01653900 | -2.41879800 | -1.53934000 |
| B | 0.02098300  | -0.00342300 | 1.56694200  |
| N | 0.00625000  | 0.00077500  | -1.53772200 |
| C | 1.46450400  | -2.46967200 | 7.82629900  |
| C | -0.70220000 | -1.31478000 | 7.89047400  |
| C | 1.55743500  | -0.01596700 | 7.87662300  |
| C | 2.19677400  | -1.27375100 | 7.82184000  |
| C | -2.11182200 | -1.23912800 | 7.85039500  |
| C | -0.69644600 | 1.29269900  | 7.89448700  |
| C | -2.10634300 | 1.22334300  | 7.85396700  |
| C | -2.78017000 | -0.00645000 | 7.85605600  |
| C | 1.47529000  | 2.43829600  | 7.83391100  |
| C | 2.20226600  | 1.23910800  | 7.82567100  |
| H | 3.28964700  | 1.29980500  | 7.79464700  |
| H | 2.01937200  | 3.37546800  | 7.80375500  |
| H | -2.71337800 | -2.14716100 | 7.82932600  |
| H | 2.00438200  | -3.40917200 | 7.79319500  |
| H | -0.42815400 | -3.47312500 | 7.81209500  |
| H | 3.28386700  | -1.33920600 | 7.79058200  |

|   |             |             |            |
|---|-------------|-------------|------------|
| H | -3.86413600 | -0.00399200 | 7.83452300 |
| H | -0.41283600 | 3.45012300  | 7.82268000 |
| H | -2.70390100 | 2.13406600  | 7.83525400 |
| C | 2.83316300  | -0.01347500 | 4.76124300 |
| C | 2.14010100  | 1.17934300  | 4.78323200 |
| C | 0.73386200  | 1.19718300  | 4.78335800 |
| C | 0.72876000  | -1.21531700 | 4.77950400 |
| C | 2.13508500  | -1.20338500 | 4.77916300 |
| C | 0.02101400  | 2.40925000  | 4.79738100 |
| C | -1.35842900 | -0.00468600 | 4.79669200 |
| C | -2.04511700 | 1.22228900  | 4.81222200 |
| C | -1.35893300 | 2.41924300  | 4.79129100 |
| C | -1.36920100 | -2.42855800 | 4.78375100 |
| H | 0.58721900  | -3.33733800 | 4.77381100 |
| H | -1.91270700 | -3.36499400 | 4.78138300 |
| H | 0.60129900  | 3.31982500  | 4.78446300 |
| H | 3.91593400  | -0.01574400 | 4.75067800 |
| H | 2.64343000  | 2.13450300  | 4.77163200 |
| H | 2.63434500  | -2.16063200 | 4.76408600 |
| H | -1.89845300 | 3.35797900  | 4.79185300 |
| H | -3.12918600 | -1.18299000 | 4.80741900 |
| H | -3.12417600 | 1.18109600  | 4.81094900 |
| C | -2.05030800 | -1.22878700 | 4.80815800 |
| C | 0.07351800  | 2.47546100  | 7.84226900 |
| C | 0.06251200  | -2.50069500 | 7.83462300 |
| C | 0.01078400  | -2.42437900 | 4.78980900 |
| B | 0.05281200  | -0.01274500 | 7.91948800 |
| N | 0.03478500  | -0.00758400 | 4.78451100 |

(5) pentamer[12]<sub>2</sub>-1

| pentamer[12] <sub>2</sub> -1 The total energy = -2497.3288 a.u. |           |           |          |
|-----------------------------------------------------------------|-----------|-----------|----------|
| Atom                                                            | X         | Y         | Z        |
| C                                                               | 1.437551  | -2.466197 | 1.569119 |
| C                                                               | -0.729558 | -1.310802 | 1.537837 |
| C                                                               | 1.528222  | -0.012451 | 1.519373 |
| C                                                               | 2.168940  | -1.269711 | 1.561217 |
| C                                                               | -2.138626 | -1.236100 | 1.587895 |
| C                                                               | -0.724530 | 1.294576  | 1.528514 |
| C                                                               | -2.133819 | 1.225636  | 1.579244 |
| C                                                               | -2.808049 | -0.003949 | 1.588445 |
| C                                                               | 1.446915  | 2.441956  | 1.551660 |
| C                                                               | 2.173686  | 1.242560  | 1.552491 |
| H                                                               | 3.261268  | 1.303491  | 1.566573 |

|   |           |           |          |
|---|-----------|-----------|----------|
| H | 1.990959  | 3.379131  | 1.567484 |
| H | -2.739441 | -2.144295 | 1.615155 |
| H | 1.977928  | -3.405355 | 1.591695 |
| H | -0.454567 | -3.469236 | 1.605750 |
| H | 3.256274  | -1.334768 | 1.575686 |
| H | -3.891507 | -0.001712 | 1.617988 |
| H | -0.441371 | 3.452428  | 1.580454 |
| H | -2.731138 | 2.136297  | 1.600347 |
| C | 0.045101  | 2.477991  | 1.560376 |
| C | 0.035537  | -2.496809 | 1.578366 |
| B | 0.024281  | -0.009681 | 1.500873 |
| C | 1.489139  | -2.444930 | 7.848914 |
| C | -0.678202 | -1.289629 | 7.864225 |
| C | 1.578914  | 0.009787  | 7.839996 |
| C | 2.219982  | -1.247588 | 7.838641 |
| C | -2.087743 | -1.215772 | 7.875966 |
| C | -0.674284 | 1.315998  | 7.855004 |
| C | -2.084195 | 1.246507  | 7.867319 |
| C | -2.757919 | 0.016448  | 7.878013 |
| C | 1.496671  | 2.464660  | 7.831325 |
| C | 2.223893  | 1.265307  | 7.829944 |
| H | 3.311679  | 1.325822  | 7.820820 |
| H | 2.040485  | 3.402374  | 7.822895 |
| H | -2.687767 | -2.125006 | 7.884120 |
| H | 2.030296  | -3.384213 | 7.847178 |
| H | -0.404042 | -3.448505 | 7.868071 |
| H | 3.307574  | -1.311537 | 7.829295 |
| H | -3.841990 | 0.018048  | 7.887364 |
| H | -0.393602 | 3.473889  | 7.842930 |
| H | -2.681439 | 2.157605  | 7.869092 |
| C | 2.844367  | -0.004551 | 4.644974 |
| C | 2.150569  | 1.188120  | 4.638312 |
| C | 0.744276  | 1.205540  | 4.652904 |
| C | 0.739877  | -1.206899 | 4.661144 |
| C | 2.146214  | -1.194701 | 4.646642 |
| C | 0.031087  | 2.417540  | 4.648780 |
| C | -1.347487 | 0.003188  | 4.670471 |
| C | -2.034749 | 1.229994  | 4.665697 |
| C | -1.348922 | 2.427444  | 4.665020 |
| C | -1.357822 | -2.421032 | 4.682303 |
| H | 0.598813  | -3.329339 | 4.668558 |
| H | -1.901023 | -3.357560 | 4.690114 |
| H | 0.611088  | 3.328464  | 4.645326 |
| H | 3.927134  | -0.006566 | 4.638126 |

|   |           |           |           |
|---|-----------|-----------|-----------|
| H | 2.653992  | 2.143380  | 4.635602  |
| H | 2.646162  | -2.151781 | 4.650864  |
| H | -1.888689 | 3.365985  | 4.665838  |
| H | -3.118191 | -1.175744 | 4.685034  |
| H | -3.113846 | 1.188719  | 4.676145  |
| C | -2.039251 | -1.221097 | 4.674686  |
| C | 0.094481  | 2.499928  | 7.842869  |
| C | 0.087020  | -2.476081 | 7.860847  |
| C | 0.022217  | -2.416262 | 4.665642  |
| B | 0.075049  | 0.012025  | 7.852907  |
| N | 0.045690  | 0.000639  | 4.662689  |
| C | 1.569762  | -2.419578 | 14.126784 |
| C | -0.596279 | -1.263549 | 14.191573 |
| C | 1.661481  | 0.034482  | 14.156895 |
| C | 2.301206  | -1.223155 | 14.111837 |
| C | -2.006006 | -1.188840 | 14.168383 |
| C | -0.590896 | 1.342009  | 14.181946 |
| C | -2.000921 | 1.272936  | 14.159400 |
| C | -2.675201 | 0.043457  | 14.172347 |
| C | 1.579918  | 2.488574  | 14.108190 |
| C | 2.306423  | 1.289042  | 14.102405 |
| H | 3.393568  | 1.349623  | 14.067226 |
| H | 2.123653  | 3.425489  | 14.074792 |
| H | -2.607245 | -2.097097 | 14.159065 |
| H | 2.109608  | -3.358959 | 14.100534 |
| H | -0.322762 | -3.422462 | 14.133316 |
| H | 3.388075  | -1.288549 | 14.076946 |
| H | -3.759017 | 0.045688  | 14.163966 |
| H | -0.308420 | 3.499286  | 14.107421 |
| H | -2.598435 | 2.183568  | 14.143306 |
| C | 2.913672  | 0.018828  | 11.009857 |
| C | 2.220354  | 1.211756  | 11.021230 |
| C | 0.813983  | 1.229560  | 11.032895 |
| C | 0.808914  | -1.182856 | 11.042197 |
| C | 2.215348  | -1.171024 | 11.030674 |
| C | 0.101275  | 2.441742  | 11.041704 |
| C | -1.278032 | 0.027838  | 11.062357 |
| C | -1.964846 | 1.254886  | 11.071459 |
| C | -1.278857 | 2.451988  | 11.050353 |
| C | -1.289086 | -2.396319 | 11.069056 |
| H | 0.667273  | -3.305211 | 11.052700 |
| H | -1.832477 | -3.332721 | 11.078479 |
| H | 0.681377  | 3.352497  | 11.027585 |
| H | 3.996385  | 0.016487  | 10.996389 |



|   |           |           |           |
|---|-----------|-----------|-----------|
| H | 2.723954  | 2.166843  | 11.007892 |
| H | 2.714908  | -2.128299 | 11.024834 |
| H | -1.818294 | 3.390713  | 11.052612 |
| H | -3.048945 | -1.150589 | 11.091088 |
| H | -3.043952 | 1.213940  | 11.081457 |
| C | -1.970021 | -1.196206 | 11.081093 |
| C | 0.178154  | 2.524857  | 14.125697 |
| C | 0.167830  | -2.449955 | 14.144298 |
| C | 0.091086  | -2.391906 | 11.060261 |
| B | 0.158084  | 0.037728  | 14.204199 |
| N | 0.115041  | 0.024866  | 11.044890 |

(6) pentamer[12]<sub>2</sub>-2

| pentamer[12] <sub>2</sub> -2 The total energy = -2527.2229 a.u. |             |             |             |
|-----------------------------------------------------------------|-------------|-------------|-------------|
| Atom                                                            | X           | Y           | Z           |
| C                                                               | 1.43776400  | -2.45819300 | 1.52993200  |
| C                                                               | -0.73021000 | -1.30430900 | 1.55496400  |
| C                                                               | 1.52985300  | -0.00373200 | 1.53076100  |
| C                                                               | 2.16989500  | -1.26193700 | 1.51949000  |
| C                                                               | -2.14013600 | -1.22919100 | 1.56041600  |
| C                                                               | -0.72582000 | 1.30440700  | 1.55000900  |
| C                                                               | -2.13609200 | 1.23407500  | 1.55610200  |
| C                                                               | -2.80888200 | 0.00360900  | 1.56574600  |
| C                                                               | 1.44608900  | 2.45092900  | 1.52056600  |
| C                                                               | 2.17418500  | 1.25230700  | 1.51480800  |
| H                                                               | 3.26214600  | 1.31299300  | 1.50438000  |
| H                                                               | 1.99028800  | 3.38900900  | 1.51198000  |
| H                                                               | -2.74074100 | -2.13830000 | 1.56708800  |
| H                                                               | 1.97889400  | -3.39807100 | 1.52484200  |
| H                                                               | -0.45530800 | -3.46315500 | 1.54812400  |
| H                                                               | 3.25763800  | -1.32641000 | 1.50920900  |
| H                                                               | -3.89349500 | 0.00540400  | 1.57411600  |
| H                                                               | -0.44364600 | 3.46221900  | 1.53505400  |
| H                                                               | -2.73359900 | 2.14523900  | 1.56008800  |
| C                                                               | 2.78517900  | -0.01368600 | -1.62654800 |
| C                                                               | 2.09601800  | 1.18155900  | -1.60099500 |
| C                                                               | 0.68957900  | 1.20104700  | -1.58637200 |
| C                                                               | 0.68477000  | -1.21994900 | -1.58149400 |
| C                                                               | 2.09126000  | -1.20605900 | -1.59590100 |
| C                                                               | -0.02541600 | 2.41242600  | -1.58335000 |
| C                                                               | -1.40969300 | -0.00525100 | -1.56074700 |
| C                                                               | -2.09543900 | 1.22272700  | -1.55623900 |
| C                                                               | -1.40551400 | 2.41753000  | -1.58988600 |

|   |             |             |             |
|---|-------------|-------------|-------------|
| C | -1.41515400 | -2.42816100 | -1.58027200 |
| H | 0.53830600  | -3.34329800 | -1.57878800 |
| H | -1.95857100 | -3.36479600 | -1.58059900 |
| H | 0.55156100  | 3.32494500  | -1.59231500 |
| H | 3.86797400  | -0.01589600 | -1.64416000 |
| H | 2.60214600  | 2.13508700  | -1.60809300 |
| H | 2.59361500  | -2.16160000 | -1.59896500 |
| H | -1.94519500 | 3.35631000  | -1.59398100 |
| H | -3.17909300 | -1.18796400 | -1.53914400 |
| H | -3.17436300 | 1.18456800  | -1.54357200 |
| C | -2.10032300 | -1.23050600 | -1.55155200 |
| C | 0.04399200  | 2.48781900  | 1.53245600  |
| C | 0.03564400  | -2.49044500 | 1.54193700  |
| C | -0.03502800 | -2.42846700 | -1.57367500 |
| B | 0.02427000  | -0.00122900 | 1.55022600  |
| N | -0.01174000 | -0.00803100 | -1.57808000 |
| C | 1.50235900  | -2.44546800 | 7.90836800  |
| C | -0.66573000 | -1.29156600 | 7.91492300  |
| C | 1.59444100  | 0.00895700  | 7.89812800  |
| C | 2.23457500  | -1.24924900 | 7.90330400  |
| C | -2.07560100 | -1.21638500 | 7.93159900  |
| C | -0.66128900 | 1.31712000  | 7.91050100  |
| C | -2.07151700 | 1.24683700  | 7.92721900  |
| C | -2.74436500 | 0.01640200  | 7.93359300  |
| C | 1.51079000  | 2.46362400  | 7.89999800  |
| C | 2.23891700  | 1.26501800  | 7.89919700  |
| H | 3.32691600  | 1.32571600  | 7.89246900  |
| H | 2.05504400  | 3.40170400  | 7.89593500  |
| H | -2.67620800 | -2.12549000 | 7.93738200  |
| H | 2.04349700  | -3.38535700 | 7.90757800  |
| H | -0.39079300 | -3.45037900 | 7.92256500  |
| H | 3.32235200  | -1.31376100 | 7.89646100  |
| H | -3.82897100 | 0.01821500  | 7.94263000  |
| H | -0.37897100 | 3.47494100  | 7.91027400  |
| H | -2.66899200 | 2.15802200  | 7.92933600  |
| C | 2.85653300  | -0.00024000 | 4.70341700  |
| C | 2.16501200  | 1.19339900  | 4.70705700  |
| C | 0.75874600  | 1.21157200  | 4.71892700  |
| C | 0.75398900  | -1.20370200 | 4.72345600  |
| C | 2.16031600  | -1.19111700 | 4.71168100  |
| C | 0.04514500  | 2.42347100  | 4.72277100  |
| C | -1.33564400 | 0.00808800  | 4.73902500  |
| C | -2.02223600 | 1.23530000  | 4.74286400  |
| C | -1.33449300 | 2.43124800  | 4.73424700  |

|   |             |             |             |
|---|-------------|-------------|-------------|
| C | -1.34406500 | -2.41507700 | 4.74363700  |
| H | 0.61173200  | -3.32594600 | 4.72838700  |
| H | -1.88758100 | -3.35182400 | 4.74999500  |
| H | 0.62488000  | 3.33439700  | 4.71605300  |
| H | 3.93960200  | -0.00239800 | 4.69445600  |
| H | 2.66873900  | 2.14835100  | 4.70131600  |
| H | 2.66027300  | -2.14806000 | 4.70972200  |
| H | -1.87429200 | 3.37015800  | 4.73692600  |
| H | -3.10586400 | -1.17120100 | 4.75713300  |
| H | -3.10121300 | 1.19445300  | 4.75221600  |
| C | -2.02705300 | -1.21638900 | 4.74777700  |
| C | 0.10865200  | 2.50053100  | 7.90950400  |
| C | 0.10019200  | -2.47767900 | 7.91817300  |
| C | 0.03559200  | -2.41273700 | 4.73193900  |
| B | 0.08873700  | 0.01146800  | 7.90251800  |
| N | 0.05912500  | 0.00534400  | 4.72715900  |
| C | 2.90606600  | 0.01050900  | 11.03617800 |
| C | 2.21659700  | 1.20572700  | 11.01778900 |
| C | 0.81007200  | 1.22524100  | 11.02589600 |
| C | 0.80519500  | -1.19581400 | 11.02982000 |
| C | 2.21177700  | -1.18196700 | 11.02147100 |
| C | 0.09512100  | 2.43659700  | 11.03034200 |
| C | -1.28935700 | 0.01894800  | 11.03763700 |
| C | -1.97507800 | 1.24693600  | 11.03984800 |
| C | -1.28470300 | 2.44176900  | 11.05833500 |
| C | -1.29449300 | -2.40381100 | 11.06660800 |
| H | 0.65872400  | -3.31907100 | 11.03745000 |
| H | -1.83777600 | -3.34043800 | 11.07923100 |
| H | 0.67219400  | 3.34909600  | 11.02673400 |
| H | 3.98901300  | 0.00831300  | 11.03603100 |
| H | 2.72284100  | 2.15921100  | 11.01334800 |
| H | 2.71417500  | -2.13749500 | 11.02011600 |
| H | -1.82420400 | 3.38061500  | 11.06770000 |
| H | -3.05886000 | -1.16374400 | 11.04893800 |
| H | -3.05405300 | 1.20882000  | 11.04431100 |
| C | -1.98004500 | -1.20628600 | 11.04436100 |
| C | 0.08535200  | -2.40425000 | 11.03834200 |
| N | 0.10869500  | 0.01615300  | 11.03326900 |

(7) hexamer [12]<sub>3</sub>

| hexamer [12] <sub>3</sub> The total energy = -3014.7366 a.u. |            |             |            |
|--------------------------------------------------------------|------------|-------------|------------|
| Atom                                                         | X          | Y           | Z          |
| C                                                            | 1.44024200 | -2.45979600 | 1.49558300 |

|   |             |             |             |
|---|-------------|-------------|-------------|
| C | -0.72774400 | -1.30576400 | 1.53112500  |
| C | 1.53189500  | -0.00513800 | 1.50781800  |
| C | 2.17208300  | -1.26328200 | 1.48302900  |
| C | -2.13784800 | -1.23088600 | 1.52115000  |
| C | -0.72354500 | 1.30277400  | 1.52575000  |
| C | -2.13394100 | 1.23240700  | 1.51614500  |
| C | -2.80680300 | 0.00186500  | 1.52630500  |
| C | 1.44821200  | 2.44969500  | 1.48521500  |
| C | 2.17618600  | 1.25086100  | 1.47789700  |
| H | 3.26402900  | 1.31166400  | 1.46211300  |
| H | 1.99226500  | 3.38762800  | 1.46834700  |
| H | -2.73847700 | -2.13992000 | 1.52250000  |
| H | 1.98131100  | -3.39951200 | 1.48272000  |
| H | -0.45277400 | -3.46471500 | 1.50659300  |
| H | 3.25971400  | -1.32771200 | 1.46714300  |
| H | -3.89132800 | 0.00358100  | 1.52508900  |
| H | -0.44159300 | 3.46067500  | 1.49165600  |
| H | -2.73162000 | 2.14338100  | 1.51351400  |
| C | 2.79664900  | -0.01401500 | -1.62207700 |
| C | 2.10617800  | 1.18062400  | -1.59233700 |
| C | 0.69966100  | 1.19955000  | -1.58130700 |
| C | 0.69531900  | -1.21989600 | -1.57663800 |
| C | 2.10189500  | -1.20602600 | -1.58788800 |
| C | -0.01526300 | 2.41089600  | -1.57756400 |
| C | -1.39806900 | -0.00637700 | -1.55867000 |
| C | -2.08432500 | 1.22136200  | -1.55369400 |
| C | -1.39555300 | 2.41691000  | -1.59071500 |
| C | -1.40425400 | -2.42978500 | -1.58099800 |
| H | 0.54976900  | -3.34326200 | -1.57669400 |
| H | -1.94734200 | -3.36638600 | -1.58557900 |
| H | 0.56174700  | 3.32341000  | -1.58959100 |
| H | 3.87923500  | -0.01600900 | -1.64203800 |
| H | 2.61191000  | 2.13438500  | -1.60304400 |
| H | 2.60421300  | -2.16162100 | -1.59513600 |
| H | -1.93525300 | 3.35543900  | -1.59912400 |
| H | -3.16756900 | -1.18907400 | -1.54217700 |
| H | -3.16332000 | 1.18274200  | -1.54711900 |
| C | -2.08871500 | -1.23162400 | -1.54861600 |
| C | 0.04601500  | 2.48632400  | 1.49502200  |
| C | 0.03798600  | -2.49194900 | 1.50555000  |
| C | -0.02394900 | -2.42864300 | -1.56801300 |
| B | 0.02657700  | -0.00269300 | 1.53511600  |
| N | -0.00101500 | -0.00889300 | -1.57399800 |
| C | 1.49215800  | -2.44291000 | 7.83482100  |

|   |             |             |             |
|---|-------------|-------------|-------------|
| C | -0.67539900 | -1.28843300 | 7.87371000  |
| C | 1.58376900  | 0.01165800  | 7.84767800  |
| C | 2.22387400  | -1.24632800 | 7.82072500  |
| C | -2.08530200 | -1.21356500 | 7.86323400  |
| C | -0.67092700 | 1.31953100  | 7.86734000  |
| C | -2.08115100 | 1.24949100  | 7.85735700  |
| C | -2.75432200 | 0.01914700  | 7.86915500  |
| C | 1.50066000  | 2.46638000  | 7.82236300  |
| C | 2.22824600  | 1.26732600  | 7.81454900  |
| H | 3.31606500  | 1.32772600  | 7.79491800  |
| H | 2.04472800  | 3.40417600  | 7.80131800  |
| H | -2.68590900 | -2.12264700 | 7.86235600  |
| H | 2.03306300  | -3.38262300 | 7.81856700  |
| H | -0.40112800 | -3.44729400 | 7.84432200  |
| H | 3.31146500  | -1.31063800 | 7.80104900  |
| H | -3.83880000 | 0.02096300  | 7.86599300  |
| H | -0.38920200 | 3.47722300  | 7.82653800  |
| H | -2.67860100 | 2.16063900  | 7.85230800  |
| C | 2.85004700  | 0.00101200  | 4.70943900  |
| C | 2.15733000  | 1.19407200  | 4.72402700  |
| C | 0.75098200  | 1.21171100  | 4.73051500  |
| C | 0.74651400  | -1.20179800 | 4.73613200  |
| C | 2.15292400  | -1.18936300 | 4.72968800  |
| C | 0.03769500  | 2.42363700  | 4.73962500  |
| C | -1.34176800 | 0.00887000  | 4.75405800  |
| C | -2.02870800 | 1.23587500  | 4.76387100  |
| C | -1.34224900 | 2.43252600  | 4.74162100  |
| C | -1.35125500 | -2.41478300 | 4.75338900  |
| H | 0.60508100  | -3.32401900 | 4.73918500  |
| H | -1.89454200 | -3.35144300 | 4.75677200  |
| H | 0.61749100  | 3.33445400  | 4.72385000  |
| H | 3.93288000  | -0.00103700 | 4.69604400  |
| H | 2.66059400  | 2.14921100  | 4.70935500  |
| H | 2.65266400  | -2.14640700 | 4.71935600  |
| H | -1.88204900 | 3.37120400  | 4.74040800  |
| H | -3.11214400 | -1.17017700 | 4.77452600  |
| H | -3.10773900 | 1.19464500  | 4.76801400  |
| C | -2.03327200 | -1.21547300 | 4.77017200  |
| C | 0.09852500  | 2.50292000  | 7.83298900  |
| C | 0.08997300  | -2.47467500 | 7.84560600  |
| C | 0.02869600  | -2.41098900 | 4.75102200  |
| B | 0.07883500  | 0.01427000  | 7.87663800  |
| N | 0.05196700  | 0.00627400  | 4.73850500  |
| C | 1.56228600  | -2.42377100 | 14.13613500 |

|   |             |             |             |
|---|-------------|-------------|-------------|
| C | -0.60408300 | -1.26880600 | 14.20866000 |
| C | 1.65542300  | 0.03016200  | 14.17525200 |
| C | 2.29444500  | -1.22781400 | 14.12170000 |
| C | -2.01388300 | -1.19332200 | 14.17633300 |
| C | -0.59853100 | 1.33889200  | 14.20101500 |
| C | -2.00867000 | 1.26921900  | 14.16904300 |
| C | -2.68223900 | 0.03939300  | 14.18077800 |
| C | 1.57280900  | 2.48415700  | 14.12155400 |
| C | 2.29986800  | 1.28505200  | 14.11432600 |
| H | 3.38704500  | 1.34563900  | 14.07602100 |
| H | 2.11660400  | 3.42123300  | 14.08300000 |
| H | -2.61548400 | -2.10147400 | 14.16222100 |
| H | 2.10209200  | -3.36335500 | 14.10318300 |
| H | -0.33030300 | -3.42748400 | 14.13736300 |
| H | 3.38134100  | -1.29334600 | 14.08366000 |
| H | -3.76633200 | 0.04164200  | 14.16510100 |
| H | -0.31540500 | 3.49591500  | 14.11631700 |
| H | -2.60638800 | 2.17983800  | 14.14948200 |
| C | 2.91163900  | 0.01887900  | 11.05363000 |
| C | 2.21863800  | 1.21172000  | 11.07456100 |
| C | 0.81245000  | 1.22957100  | 11.08272600 |
| C | 0.80724500  | -1.18257000 | 11.08939800 |
| C | 2.21352900  | -1.17077000 | 11.08098400 |
| C | 0.09984400  | 2.44169000  | 11.09525900 |
| C | -1.27948800 | 0.02807800  | 11.11279400 |
| C | -1.96607900 | 1.25509700  | 11.12661800 |
| C | -1.28012000 | 2.45189100  | 11.09670600 |
| C | -1.29060400 | -2.39572600 | 11.11070200 |
| H | 0.66570700  | -3.30447400 | 11.09265900 |
| H | -1.83412100 | -3.33212100 | 11.11459300 |
| H | 0.68012900  | 3.35208900  | 11.07392300 |
| H | 3.99429200  | 0.01649100  | 11.03557500 |
| H | 2.72172800  | 2.16686200  | 11.05473200 |
| H | 2.71250900  | -2.12815400 | 11.06611700 |
| H | -1.81957600 | 3.39063400  | 11.09504200 |
| H | -3.05024400 | -1.14982100 | 11.13809500 |
| H | -3.04511900 | 1.21384900  | 11.13050100 |
| C | -1.97139400 | -1.19580400 | 11.13384000 |
| C | 0.17108600  | 2.52134400  | 14.13800000 |
| C | 0.16042600  | -2.45492700 | 14.15291900 |
| C | 0.08938200  | -2.39147500 | 11.10904100 |
| B | 0.15097200  | 0.03349900  | 14.22744700 |
| N | 0.11343800  | 0.02503400  | 11.09325500 |
